# Supplementary material for: DataRemix: a universal data transformation for optimal inference from gene expression datasets
Source: bioRxiv or medRxiv preprint supplement (doi:10.1101/357467), 2019-08-27
Supplement: Supplementary file [file media-2.pdf]

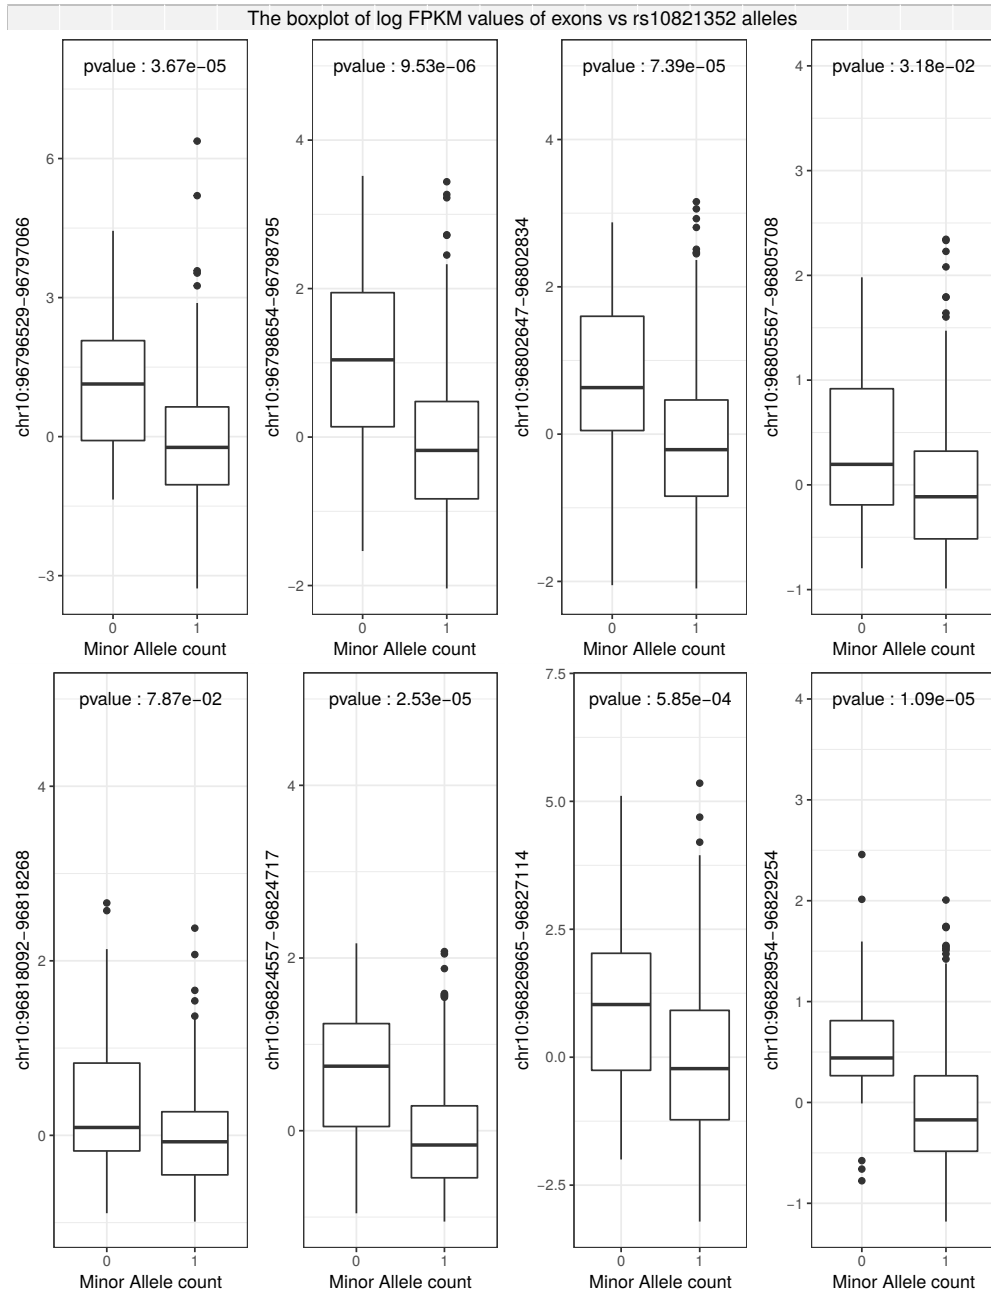

Figure S1: The effect of rs10821352 on CYP2C8 expression is consistent across exons. We used raw FPKM data to quantify the exon-level trans-eQTL effects. The effect is consistent across exons further confirming that it is unlikely to be due to homolog mismatching and other technical artifacts.

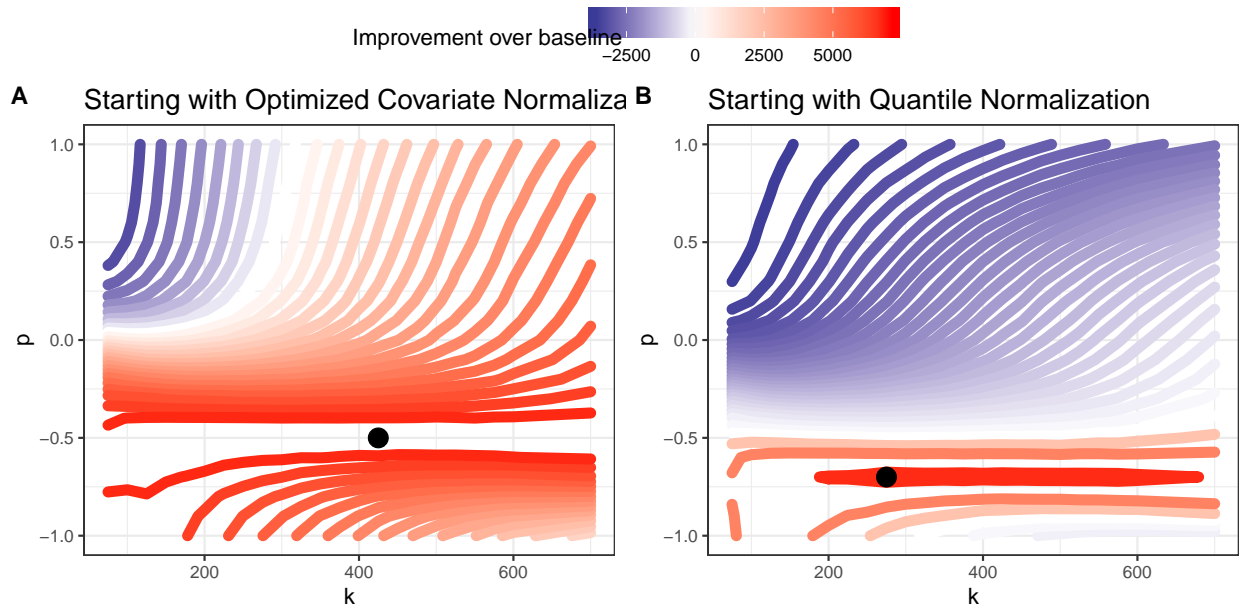

Figure S2: Contour plot representing the effects of the  $k$  and  $p$  parameters on the performance of DataRemix regarding cis-eQTL discovery on training set. The  $\mu$  parameter is fixed at 0.01. Red contours represent parameter combinations that increase the number cis-eQTLs beyond what can be achieved using the  $D_{HCP-cis}$  dataset. Panel A shows the results starting with  $D_{cis-optimal}$  while  $D_{QN}$  is used for panel B. Improvement can be achieved starting with either datasets. We note that the optimal  $p$  parameter is negative (though slightly different) for both datasets.

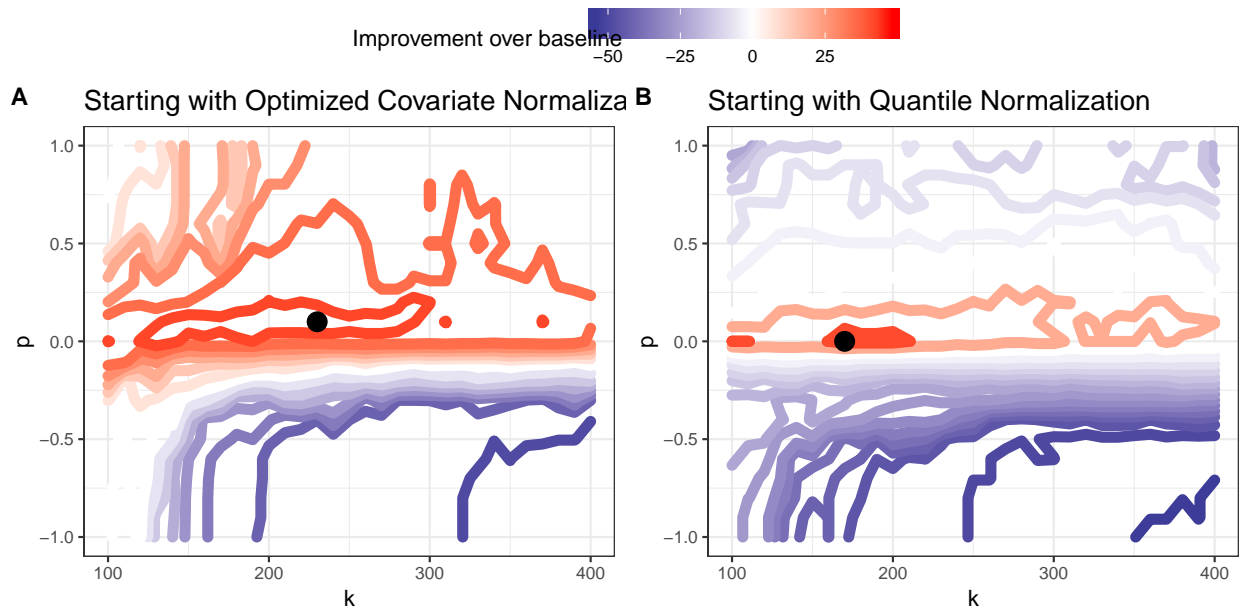

Figure S3: Contour plot representing the effects of the  $k$  and  $p$  parameters on the performance of DataRemix regarding trans-eQTL discovery on training set. The  $\mu$  parameter is fixed at 0.01. Red contours represent parameter combinations that increase the number trans-eQTLs beyond what can be achieved using the  $D_{HCP-trans}$  dataset. Panel A shows the results starting with  $D_{HCP-trans}$  while  $D_{QN}$  is used for panel B. Improvement can be achieved starting with either datasets. We find that the region of improved performance is smaller than for cis-eQTLs and is particularly concentrated when starting with the  $D_{QN}$  (panel B) dataset.
